# Supplementary material for: Changes in self-reported HIV testing during South Africa's 2010/2011 national testing campaign: gains and shortfalls
Source: PubMed Central journal article supplement (PMC4829657; doi:10.7448/ias.19.1.20658), 2016-04-11
Supplement: JIAS-19-20658-s002.pdf [file JIAS-19-20658-s002.pdf]

## Additional File 2

**Table A2:** Logistic regression models of factors associated with HIV testing among the full African sample in 2010/11

| Model                                     | Full sample<br>1            | African men<br>2            | African women<br>3          |
|-------------------------------------------|-----------------------------|-----------------------------|-----------------------------|
| Female                                    | 2.262***<br>[1.963 - 2.607] |                             |                             |
| Age                                       | 1.109***<br>[1.072 - 1.147] | 1.139***<br>[1.086 - 1.195] | 1.088***<br>[1.045 - 1.133] |
| Age squared                               | 0.998***<br>[0.998 - 0.999] | 0.998***<br>[0.998 - 0.999] | 0.999***<br>[0.998 - 0.999] |
| Log real pc household income              | 1.211***<br>[1.120 - 1.309] | 1.329***<br>[1.185 - 1.491] | 1.124**<br>[1.027 - 1.230]  |
| Years of education                        | 1.087***<br>[1.063 - 1.112] | 1.072***<br>[1.036 - 1.110] | 1.098***<br>[1.069 - 1.128] |
| Enrolled in education                     | 0.467***<br>[0.377 - 0.579] | 0.606***<br>[0.414 - 0.886] | 0.355***<br>[0.270 - 0.467] |
| Unemployed (base = employed)              | 0.836*<br>[0.689 - 1.015]   | 0.707**<br>[0.501 - 0.999]  | 0.968<br>[0.765 - 1.224]    |
| Not economically active (base = employed) | 0.788**<br>[0.647 - 0.960]  | 0.901<br>[0.699 - 1.162]    | 0.798*<br>[0.635 - 1.004]   |
| Married/cohabitating                      | 1.458***<br>[1.248 - 1.704] | 1.588***<br>[1.246 - 2.024] | 1.228**<br>[1.006 - 1.498]  |
| Religion very important                   | 1.499***<br>[1.106 - 2.032] | 1.473**<br>[1.090 - 1.991]  | 1.565*<br>[0.953 - 2.569]   |
| Poor/fair health (base = good/excellent)  | 1.650***<br>[1.321 - 2.062] | 1.741***<br>[1.238 - 2.449] | 1.685***<br>[1.283 - 2.211] |
| CESD 8 scale                              | 1.006<br>[0.987 - 1.024]    | 1.020<br>[0.993 - 1.048]    | 0.998<br>[0.977 - 1.018]    |
| Drinks alcohol                            | 1.081<br>[0.889 - 1.314]    | 1.059<br>[0.829 - 1.353]    | 1.136<br>[0.861 - 1.499]    |
| Rural (base = urban formal)               | 0.855<br>[0.672 - 1.089]    | 0.817<br>[0.589 - 1.134]    | 0.921<br>[0.721 - 1.176]    |
| Urban Informal (base = urban formal)      | 0.846<br>[0.650 - 1.100]    | 0.681*<br>[0.456 - 1.016]   | 1.071<br>[0.767 - 1.495]    |
| Control for Province of residence         | Yes                         | Yes                         | Yes                         |
| Observations                              | 13,213                      | 5,447                       | 7,766                       |
| Pseudo R-squared                          | 0.137                       | 0.127                       | 0.143                       |

Notes: 95% Confidence Intervals in brackets

\*\*\* p<0.01, \*\* p<0.05, \* p<0.1

A full description of all the independent variables can be found in Additional File 2.
