# Supplementary material for: Changes in self-reported HIV testing during South Africa's 2010/2011 national testing campaign: gains and shortfalls
Source: PubMed Central journal article supplement (PMC4829657; doi:10.7448/ias.19.1.20658), 2016-04-11
Supplement: JIAS-19-20658-s004.pdf [file JIAS-19-20658-s004.pdf]

## Additional file 4

**Table A3:** Logistic regression models of factors associated with first-time HIV testing between 2010 and 2012 among black African populations living in urban informal areas and among black African women by reported pregnancy

| Model                                           | Urban informal sample      | African women pregnancy reported | African women no pregnancy  |
|-------------------------------------------------|----------------------------|----------------------------------|-----------------------------|
|                                                 | 1<br>aOR [95%CI]           | 2<br>aOR [95%CI]                 | 3<br>aOR [95%CI]            |
| <b>Female</b>                                   | 1.991**<br>[1.007 - 3.940] | na<br>na                         | na<br>na                    |
| <b>Age</b>                                      | 1.071<br>[0.976 - 1.176]   | 0.972<br>[0.860 - 1.098]         | 1.062***<br>[1.022 - 1.103] |
| <b>Age squared</b>                              | 0.999<br>[0.998 - 1.000]   | 1.000<br>[0.998 - 1.001]         | 0.999***<br>[0.999 - 0.999] |
| <b>Log real pc household income</b>             | 0.894<br>[0.539 - 1.481]   | 1.125<br>[0.849 - 1.490]         | 0.896<br>[0.786 - 1.022]    |
| <b>Years of education</b>                       | 1.096*<br>[0.993 - 1.209]  | 1.078<br>[0.975 - 1.192]         | 1.091***<br>[1.053 - 1.130] |
| <b>Currently enrolled in school</b>             | 1.213<br>[0.468 - 3.146]   | 0.848<br>[0.237 - 3.036]         | 0.434***<br>[0.269 - 0.698] |
| <b>Unemployed (base = employed)</b>             | 1.095<br>[0.350 - 3.419]   | 2.304<br>[0.574 - 9.249]         | 1.091<br>[0.705 - 1.687]    |
| <b>Economically inactive (base = employed)</b>  | 1.453<br>[0.457 - 4.621]   | 1.511<br>[0.606 - 3.769]         | 1.037<br>[0.735 - 1.465]    |
| <b>Married/cohabitating</b>                     | 0.983<br>[0.500 - 1.934]   | 1.001<br>[0.479 - 2.095]         | 1.226<br>[0.897 - 1.674]    |
| <b>Religion very important</b>                  | 1.539**<br>[1.043 - 2.272] | 1.359<br>[0.825 - 2.238]         | 1.138<br>[0.940 - 1.377]    |
| <b>Poor/fair health (base = good/excellent)</b> | 0.887<br>[0.329 - 2.389]   | 1.365<br>[0.422 - 4.418]         | 0.739*<br>[0.518 - 1.055]   |
| <b>CESD 8 scale</b>                             | 0.928**<br>[0.875 - 0.984] | 0.952<br>[0.882 - 1.027]         | 1.006<br>[0.978 - 1.036]    |
| <b>Drinks alcohol</b>                           | 1.118<br>[0.649 - 1.927]   | 1.891<br>[0.716 - 4.995]         | 1.111<br>[0.690 - 1.789]    |
| <b>Rural (base = urban formal)</b>              | na                         | 1.008<br>[0.397 - 2.559]         | 1.151<br>[0.787 - 1.683]    |
| <b>Urban Informal (base = urban formal)</b>     | na                         | 1.240<br>[0.294 - 5.237]         | 1.586<br>[0.724 - 3.473]    |
| <b>Days between interview</b>                   | 1.000<br>[0.997 - 1.003]   | 1.001<br>[0.997 - 1.006]         | 0.999<br>[0.998 - 1.001]    |
| <b>Pregnant between waves</b>                   | 1.909**<br>[1.137 - 3.204] | na<br>na                         | na<br>na                    |
| <b>Controls for Province of residence</b>       | No <sup>^</sup>            | Yes                              | Yes                         |
| <b>Observations</b>                             | 419                        | 655                              | 2,712                       |

Notes: \*\*\* p<0.01, \*\* p<0.05, \* p<0.1. 95% Confidence Intervals in brackets. Each column represents a separate logistic regression. The sample of interest is described in the header. The sample for Model 2 is all women who

reported having been pregnant during the study period. The sample for Model 3 is all women who did not report having been pregnant during the study period. All samples are restricted to those individuals surveyed both in 2010/2011 and 2012 who reported never having been tested for HIV in the former survey wave. As such, these regressions assess the determinants of first-time testing by 2012 among the sample of never testers in 2010/2011.

^Province controls not included due to insufficient sample size.
